# Supplementary material
Source: PubMed Central journal article supplement (PMC7448831)
Supplement: jama-324-761-s004.pdf [file jama-324-761-s004.pdf]

## Supplementary Online Content 4

Pereira NL, Farkouh ME, So D, et al. Effect of genotype-guided oral P2Y12 inhibitor selection vs conventional clopidogrel therapy on ischemic outcomes after percutaneous coronary intervention: the TAILOR-PCI randomized clinical trial. *JAMA*. doi:10.1001/jama.2020.12443

### Data Sharing Statement

#### Data

**Data available:** No
